# Supplementary material
Source: PubMed Central journal article supplement (PMC5505181)
Supplement: NIHMS869797-supplement-FigureS1_S6.pdf [file NIHMS869797-supplement-FigureS1_S6.pdf]

## Supplementary Materials Figures for

H<sub>2</sub>S Production by Reactive Oxygen Species in the Carotid Body Triggers Hypertension in a Rodent Model of Sleep Apnea

Guoxiang Yuan, Ying-Jie Peng, Shakil A. Khan, Jayasri Nanduri, Amritha Singh, Chirag Vasavda, Gregg L. Semenza, Ganesh K. Kumar, Solomon H. Snyder, Nanduri R. Prabhakar\*

\*Corresponding author. E-mail: [nanduri@uchicago.edu](mailto:nanduri@uchicago.edu)

**The PDF file includes:**

**Fig. S1.** Effect of IH on H<sub>2</sub>S, MDA and CSE protein abundance in rat liver.

**Fig. S2.** Effect of IH on HO-2 mRNA and protein levels.

**Fig. S3.** Analysis of CSE and HO-2 protein abundance in HEK-293 cells.

**Fig. S4.** Effect of IH on CO concentration in HO-1 expressing HEK-293 cells.

**Fig. S5.** Analysis of carotid body sensory nerve activity.

**Fig. S6.** Carotid body response to intermittent hypoxia in heme oxygenase-2 (HO-2) null mice

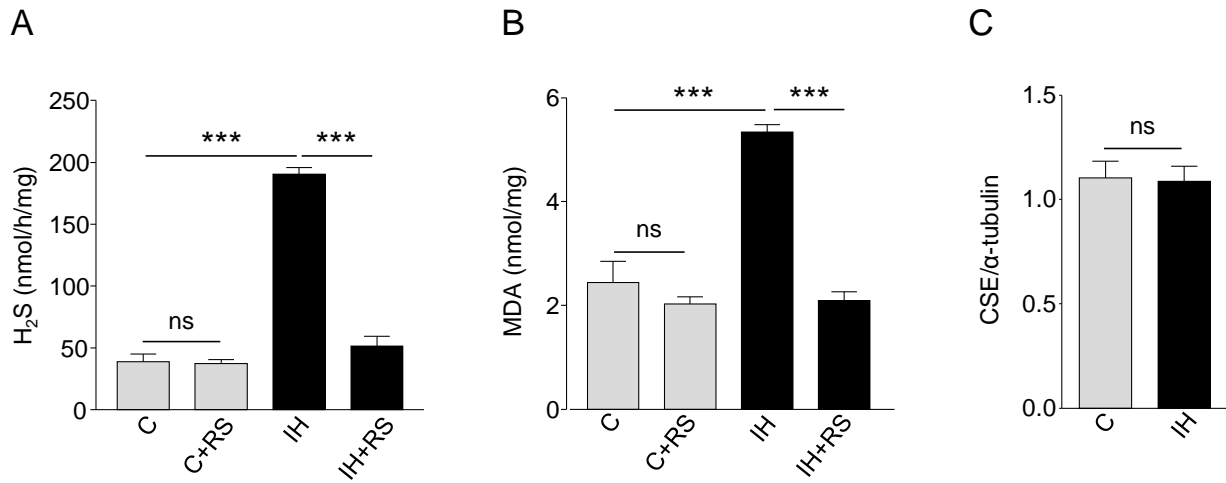

**Fig. S1. Effect of IH on H<sub>2</sub>S and MDA concentrations and CSE protein abundance in rat liver.** (A to B) H<sub>2</sub>S (A) and MDA (B) amounts in liver tissue of rats exposed to room air (C), room air with ROS scavenger (RS; C+RS), IH, or IH treatment with RS (IH+RS) ( $n = 3$  rats for each treatment). (C) Densitometry analysis of CSE protein abundance in liver tissue of rats exposed to room air (C) or IH ( $n = 3$  rats for each treatment) presented as ratio of CSE/ $\alpha$ -tubulin (loading control). Data are presented as means  $\pm$  SEM. \*\*\* $p < 0.001$ ; ns, not significant.

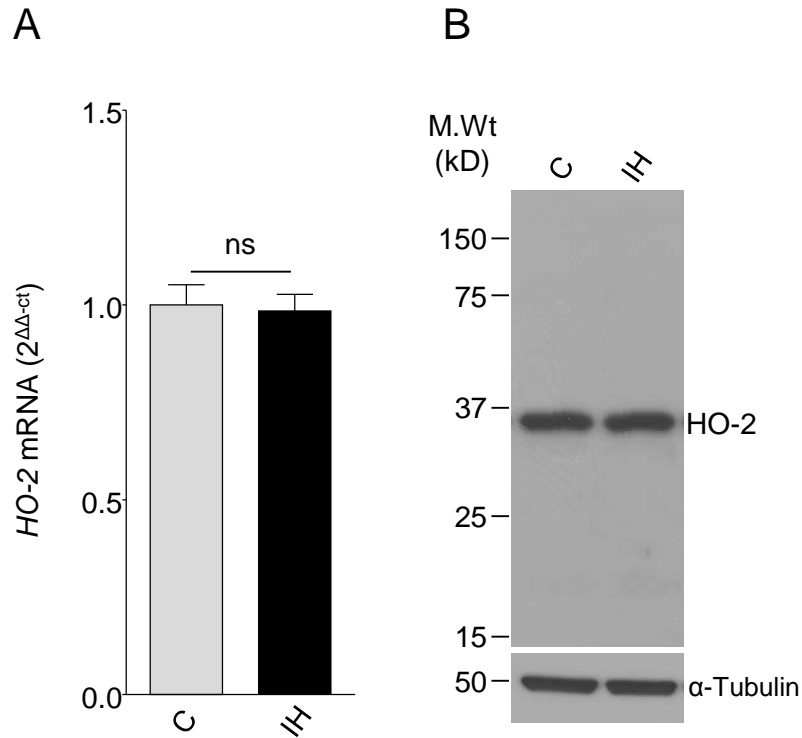

**Fig. S2. Effect of IH on *HO-2* mRNA levels and protein abundance.** (A) The ratio of *HO-2* mRNA to *18S* rRNA in carotid bodies of rats exposed to room air (C) or IH was determined by RT-qPCR and normalized to C ( $n = 5$  for each treatment). Data are presented as means  $\pm$ SEM. ns, not significant. (B) Representative immunoblot of HO-2 protein abundance in liver tissue from room air (C) and IH-exposed rats ( $n = 3$  rats for each treatment).  $\alpha$ -tubulin abundance was assayed as a loading control.

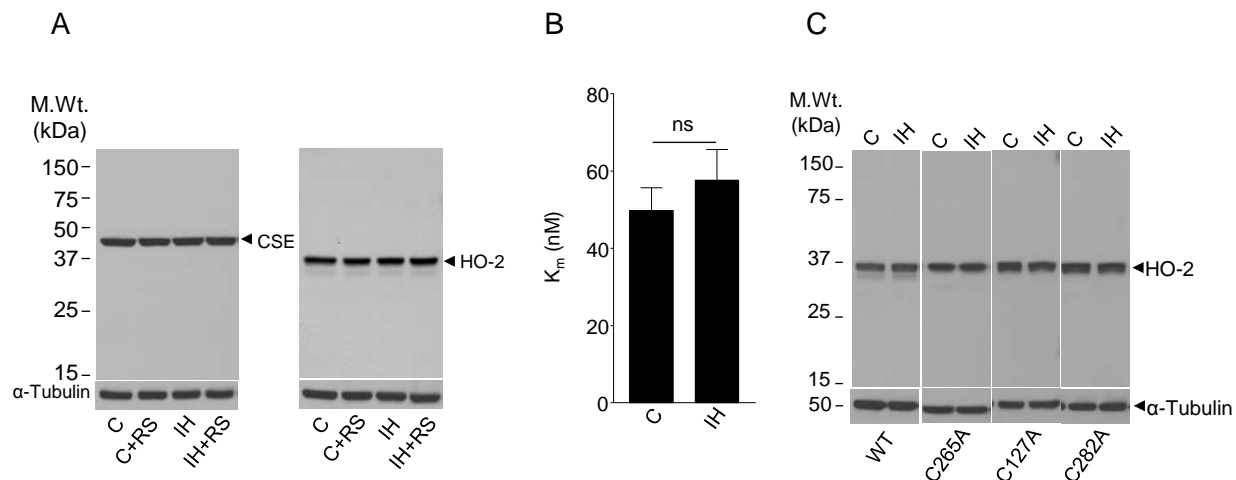

**Fig. S3. Analysis of CSE and HO-2 protein abundance in HEK-293 cells.** (A) Representative immunoblots of CSE and HO-2 protein abundance in CSE and HO-2-expressing HEK-293 cells exposed to room air (20% O<sub>2</sub>), (C), room air with ROS scavenger (C+RS), IH, or IH with RS (IH+RS) (*n* = 5 independent experiments). (B) Hemin binding affinity ( $K_m$ ) of HO-2 in HEK-293 cells expressing wild-type HO-2 treated with room air (20% O<sub>2</sub>), (C) or IH (*n* = 4 experiments for each treatment). Data are presented as means  $\pm$ SEM. ns, not significant. (C) HO-2 protein abundance in HEK-293 cells expressing either wild-type (WT) or mutant (C265A, C127A, or C282A) HO-2 exposed to room air (20% O<sub>2</sub>), (C) or IH (*n* = 4 independent experiments for each treatment).  $\alpha$ -tubulin abundance was assayed as a loading control.

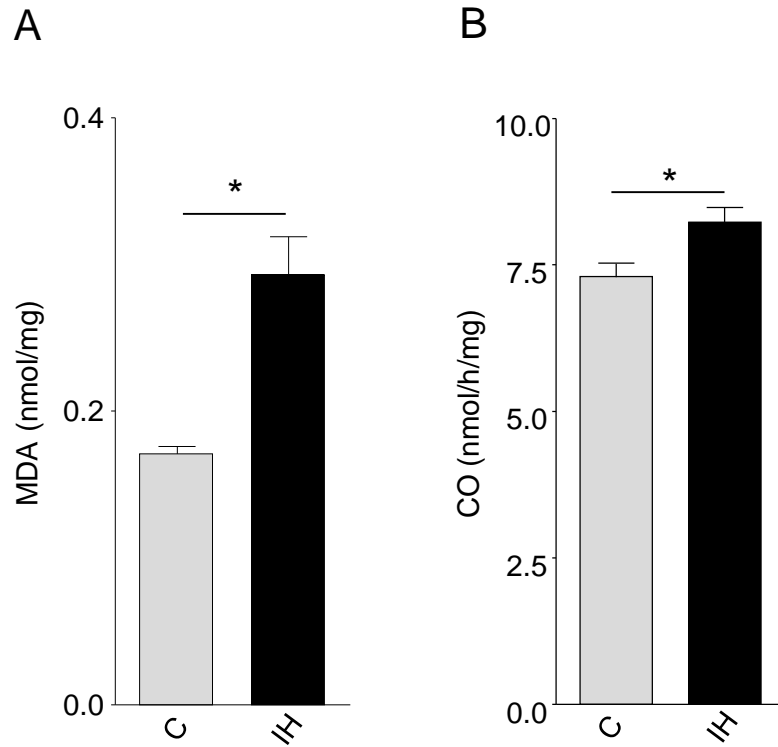

**Fig. S4. Effect of IH on CO concentration in HO-1-expressing HEK-293 cells.** (A) MDA and (B) CO concentrations in HO-1 expressing HEK-293 cells exposed to room air (20% O<sub>2</sub>), (C) or IH ( $n = 4$  independent experiments for each treatment. Data are presented as means  $\pm$ SEM. \* $p < 0.05$ ).

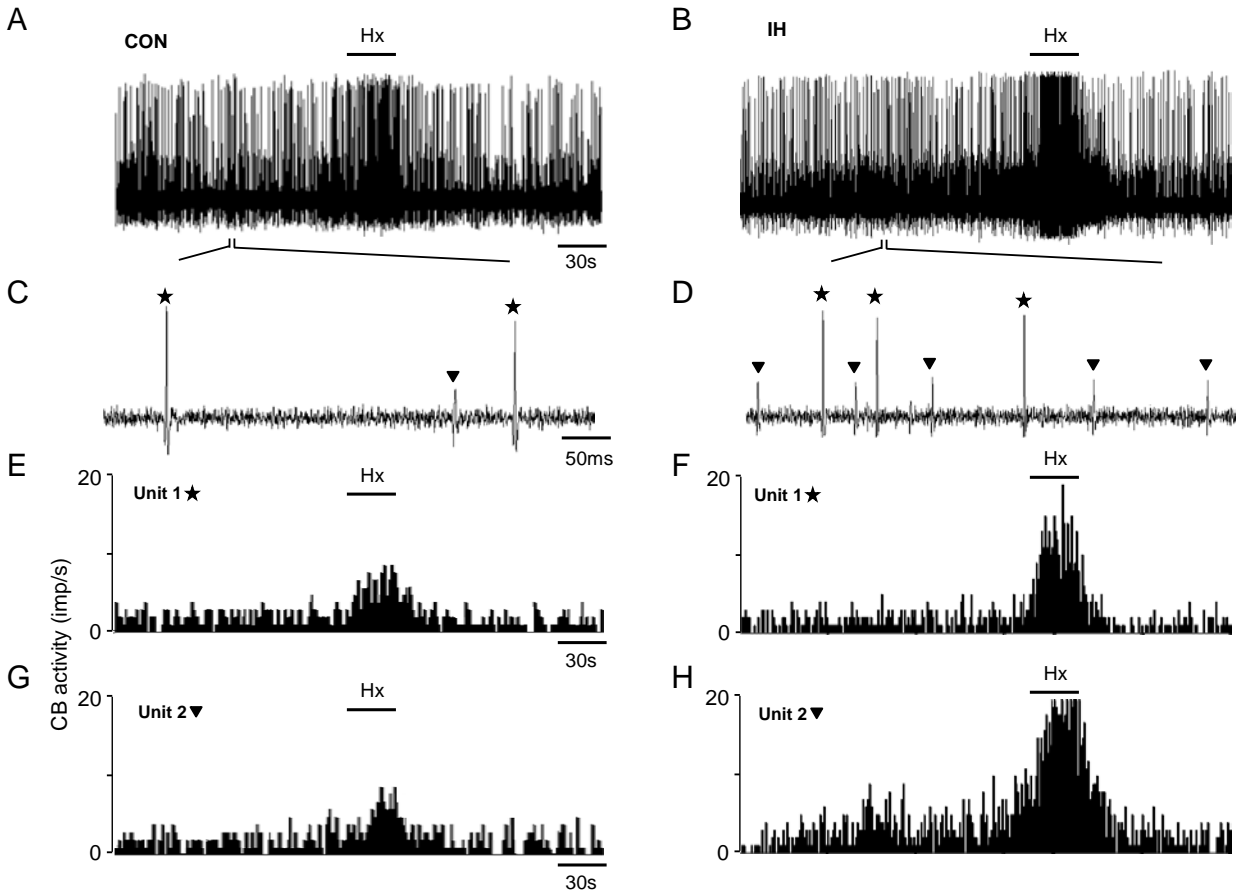

**Fig. S5. Analysis of carotid body sensory nerve activity.** (A to B) Upper panels show examples of raw action potentials recorded from the carotid sinus nerve of carotid bodies harvested from rats exposed to room air (CON, A) and intermittent hypoxia (IH, B) and their response to acute hypoxia (Hx). (C to D) Lower panels show identification of two “single units” with differing amplitudes in the control (C) and IH (D) treated carotid bodies. (E to F) Analysis of spike frequencies of Unit 1 (E and F) and Unit 2 (G and H).

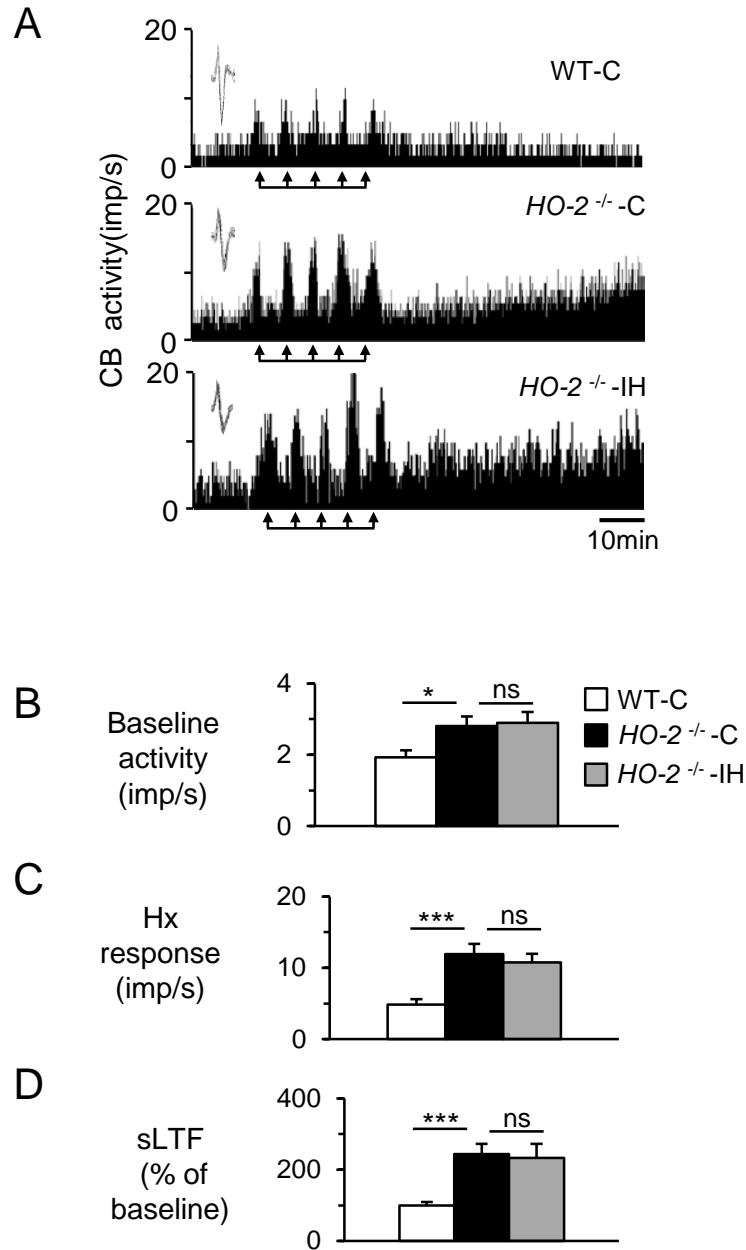

**Fig. S6. Carotid body response to intermittent hypoxia in heme oxygenase-2 (HO-2) null mice** (A) Examples of *ex vivo* carotid body sensory nerve responses during five 30-sec episodes of AIH (at arrows) and post-AIH for 60 min (sensory LTP; sLTF) from wild-type and HO-2 null mice exposed to room air (WT-C, *HO-2<sup>-/-</sup> -C*) or HO-2 null mice exposed to intermittent hypoxia (*HO-2<sup>-/-</sup> -IH*). (B to D) Average data of pre-AIH baseline activity (B), hypoxia (Hx) response (mean of 5 episodes of AIH; C), and sLTF (averaged over 60 min of post-AIH; D) ( $n =$

6 experiments for each treatment per genotype; 12 single units from 6 carotid bodies for each treatment per genotype. Data are presented as means  $\pm$  SEM. \* $p < 0.05$ ; \*\*\* $p < 0.001$ ; ns, not significant.
